# Supplementary material for: Long-term exclusive enteral nutrition remodels the gut microbiota and alleviates TNBS-induced colitis in mice
Source: Royal Society of Chemistry journal article supplement (doi:10.1039/d1fo03579g), 2022-01-01
Supplement: d1fo03579g1.pdf [file d1fo03579g1.pdf]

**Supplementary Table 1.** Constituents of the Peptisorb Enteral Nutritional Suspensions  
(energy density: 1 kcal/mL)

| <b>Constituents</b>     | <b>Units</b> | <b>Per 500 mL</b> |
|-------------------------|--------------|-------------------|
| Maltodextrin            | g            | 88                |
| Hydrolyzed Whey Protein | g            | 20                |
| Fat                     | g            | 8.5               |
| Potassium               | g            | 0.75              |
| Sodium                  | g            | 0.5               |
| Calcium                 | g            | 0.4               |
| Magnesium               | g            | 0.115             |
| Phosphorus              | g            | 0.36              |
| Chlorine                | g            | 0.625             |
| Iron                    | mg           | 8.0               |
| Zinc                    | mg           | 6.0               |
| Copper                  | mg           | 0.9               |
| Manganese               | mg           | 1.65              |
| Fluorine                | mg           | 0.5               |
| Iodine                  | mg           | 0.065             |
| Molybdenum              | mg           | 0.05              |
| Chromium                | ug           | 33.5              |
| Selenium                | ug           | 28.5              |
| Vitamin A               | IU           | 1365.3            |
| Vitamin B1              | mg           | 0.75              |
| Vitamin B2              | mg           | 0.8               |
| Vitamin B6              | mg           | 0.85              |
| Vitamin B12             | ug           | 1.05              |
| Vitamin C               | mg           | 50.0              |
| Vitamin D               | ug           | 3.5               |
| Vitamin E               | mg           | 9.7               |
| Vitamin K               | ug           | 26.5              |
| Niacin                  | mg           | 4.0               |
| Pantothenic acid        | mg           | 2.65              |
| Folate                  | mg           | 0.135             |
| Biotin                  | mg           | 0.02              |
| Choline                 | g            | 0.185             |

|                         |    |      |
|-------------------------|----|------|
| Mixtures of carotenoids | mg | 1.0  |
| Taurine                 | g  | 0.05 |

**Supplementary Table 2.** Constituents of the standard mouse chow diet

| Constituents     | Units | Per 1000 g |
|------------------|-------|------------|
| Water            | g     | ≤ 100      |
| Crude protein    | g     | ≥ 190      |
| Crude fat        | g     | ≥ 60       |
| Crude fiber      | g     | ≤ 50       |
| Crude ash        | g     | ≤ 80       |
| Calcium          | g     | 10-13      |
| Total phosphorus | g     | 6-10       |
| Magnesium        | g     | ≥ 2.0      |
| Potassium        | g     | ≥ 5.0      |
| Sodium           | g     | ≥ 2.0      |
| Iron             | mg    | ≥ 280      |
| Manganese        | mg    | ≥ 75       |
| Copper           | mg    | ≥ 10       |
| Zinc             | mg    | ≥ 100      |
| Iodine           | mg    | ≥ 1.1      |
| Selenium         | mg    | ≥ 0.1      |
| Vitamin A        | IU    | ≥ 14000    |
| Vitamin D        | IU    | ≥ 4500     |
| Vitamin E        | IU    | ≥ 120      |
| Vitamin K        | mg    | ≥ 20.0     |
| Vitamin B1       | mg    | ≥ 80.0     |
| Vitamin B2       | mg    | ≥ 12       |
| Vitamin B6       | mg    | ≥ 12       |
| Vitamin B12      | mg    | ≥ 0.022    |
| Niacin           | mg    | ≥ 60       |
| Pantothenic acid | mg    | ≥ 24       |
| Folate           | mg    | ≥ 4.0      |
| Biotin           | mg    | ≥ 0.20     |
| Choline          | mg    | ≥ 1500     |
| Vitamin C        | mg    | /          |

|              |      |      |
|--------------|------|------|
| Total energy | kcal | 3641 |
|--------------|------|------|

**Supplementary Table 3. Histological scoring system of TNBS-induced colitis**

| <b>Grade</b> | <b>Pathological characteristics</b>                                                                                                                                                       |
|--------------|-------------------------------------------------------------------------------------------------------------------------------------------------------------------------------------------|
| Grade 0      | No evidence of inflammation                                                                                                                                                               |
| Grade 1      | Low level of leukocyte infiltration with infiltration seen in <10% /HPF. No structural changes.                                                                                           |
| Grade 2      | Moderate level of leukocyte infiltration with infiltration seen in 10% to 25% /HPF, crypt elongation, bowel wall thickening that does not extend beyond the mucosal layer, and no ulcers. |
| Grade 3      | High level of leukocyte infiltration seen in 25% to 50% /HPF, crypt elongation, infiltration beyond the mucosal layer, thickening of bowel wall and superficial ulcers.                   |
| Grade 4      | Marked degree of transmural leukocyte infiltration seen in >50% /HPF, elongated and distorted crypts, bowel wall thickening, and extensive ulcerations.                                   |
